# Supplementary material for: Long term structural and functional neural changes following a single infusion of Ketamine in PTSD
Source: PubMed Central journal article supplement (PMC10517133; doi:10.1038/s41386-023-01606-3), 2023-06-03

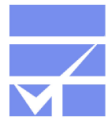

# CONSORT

TRANSPARENT REPORTING of TRIALS

## CONSORT 2010 Flow Diagram

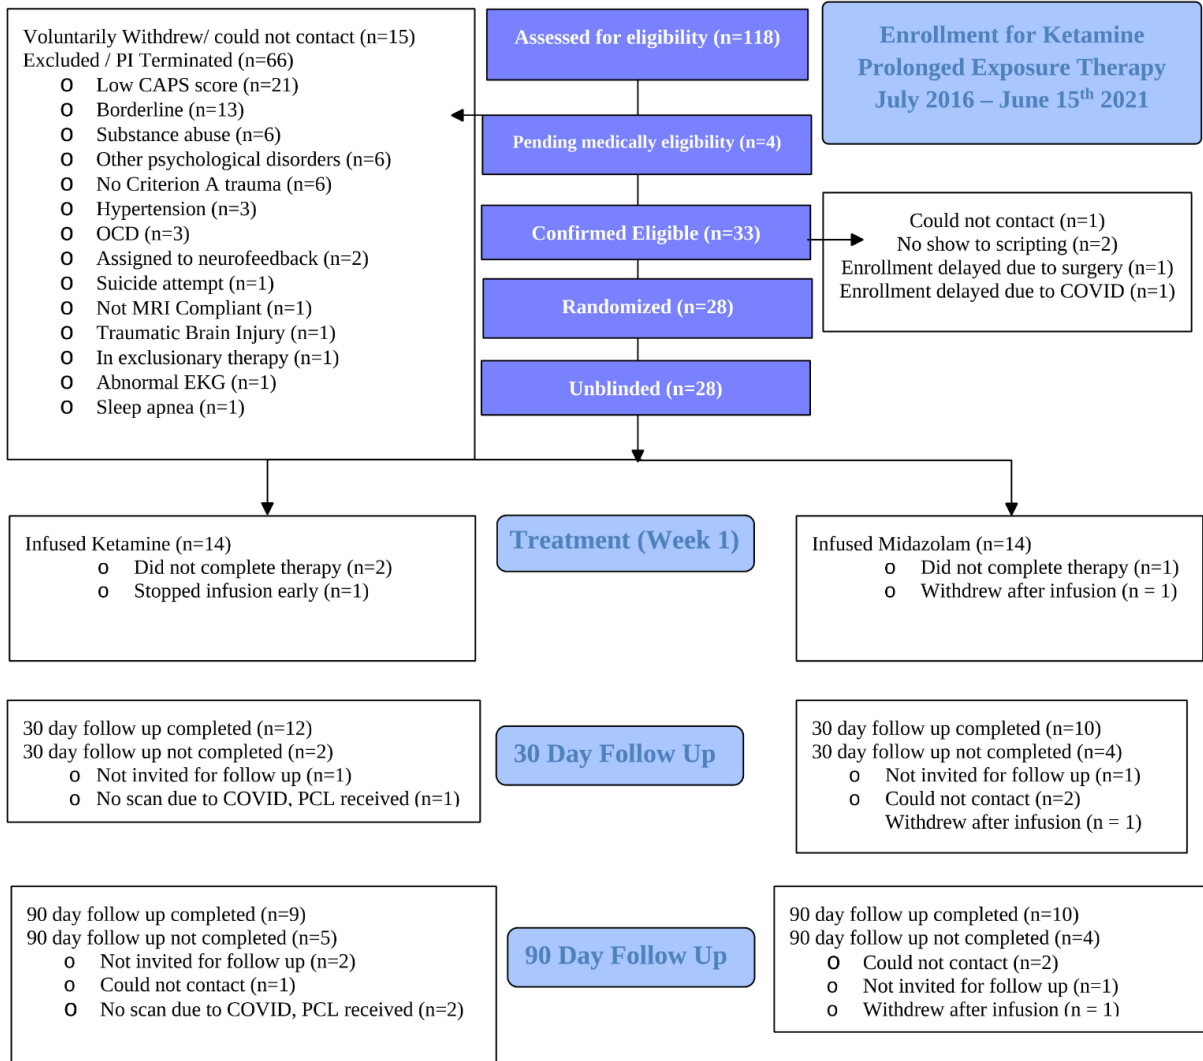

Supplement: 41386_2023_1606_MOESM1_ESM.pdf [file 41386_2023_1606_MOESM1_ESM.pdf]
